# Supplementary material for: Transforming Motivation for Exercise in a Safe and Kind Environment—A Qualitative Study of Experiences among Individuals with Type 2 Diabetes
Source: MDPI journal article supplement (doi:10.3390/ijerph19106091), 2022-05-17
Supplement: s1 [file s1]

## Supplementary Material

**Table S1.** Initial themes and sub-themes.

| Themes                       | Sub-Themes                              |
|------------------------------|-----------------------------------------|
| Experiences with exercise    | Experiences from before                 |
|                              | Exercise intensity                      |
|                              | Taking initiatives/signs of empowerment |
|                              | Role of the physiotherapist             |
|                              | Feeling safe                            |
| Sustaining physical activity | Barriers                                |
|                              | Home exercises                          |
|                              | Planning                                |
| Who we are                   | Having diabetes                         |
|                              | Special needs                           |
|                              | Focusing on feet                        |
|                              | Women's class                           |
| Motivation                   | Being healthy                           |
|                              | Feeling good                            |
|                              | Social atmosphere                       |
| Class structure              | Time and day                            |
| Satisfaction                 | Transportation                          |
